# Supplementary material for: The role of solvent molecular weight in shear thickening and shear jamming
Source: Royal Society of Chemistry journal article supplement (doi:10.1039/d0sm01350a), 2021-01-01
Supplement: d0sm01350a1.pdf [file d0sm01350a1.pdf]

Supplemental Information for

## The Role of Solvent Molecular Weight in Shear Thickening and Shear Jamming

Mike van der Naald<sup>a,†</sup>, Liang Zhao<sup>a,†</sup>, Grayson L. Jackson<sup>†</sup>, Heinrich M. Jaeger<sup>a,†</sup>

<sup>a</sup>Physics Department, The University of Chicago, Chicago, IL, USA

<sup>†</sup>James Franck Institute, The University of Chicago, Chicago, IL, USA

email: h-jaeger@uchicago.edu (Heinrich Jaeger)

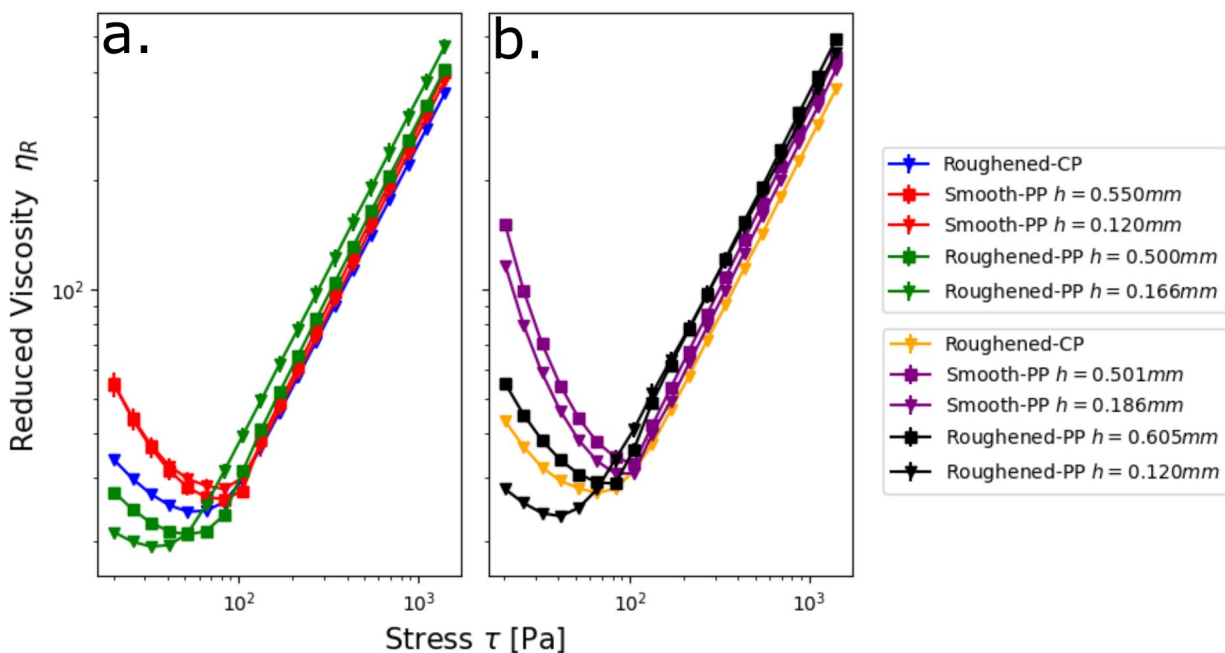

**Figure S1:** Steady state rheometry data from suspensions of Aerosil OX-50 particles with  $\phi = 0.337$  in PEG-200 and  $\phi = 0.339$  in PEG-400. Measured separately with a 25mm parallel plate (PP) geometry with roughened top and bottom plates at two different gap heights, 25mm cone and plate (CP) geometry with  $\beta=1^\circ$  and roughened top and bottom plates, and a smooth 25mm parallel plate geometry with at two different gap heights. Viscosity is plotted as a function of shear stress for suspensions in (a) PEG-200 and (b) PEG-400.

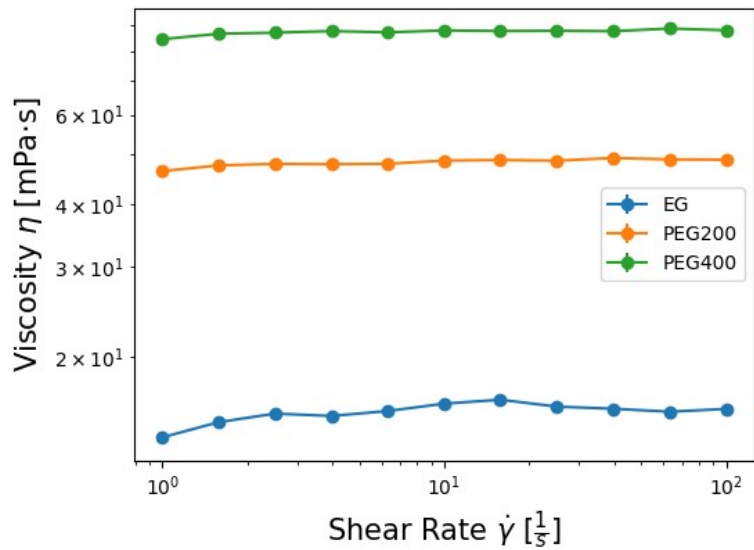

**Figure S2:** Steady state rheometry data for the Newtonian suspending liquids used in this study EG, PEG-200, and PEG-400.

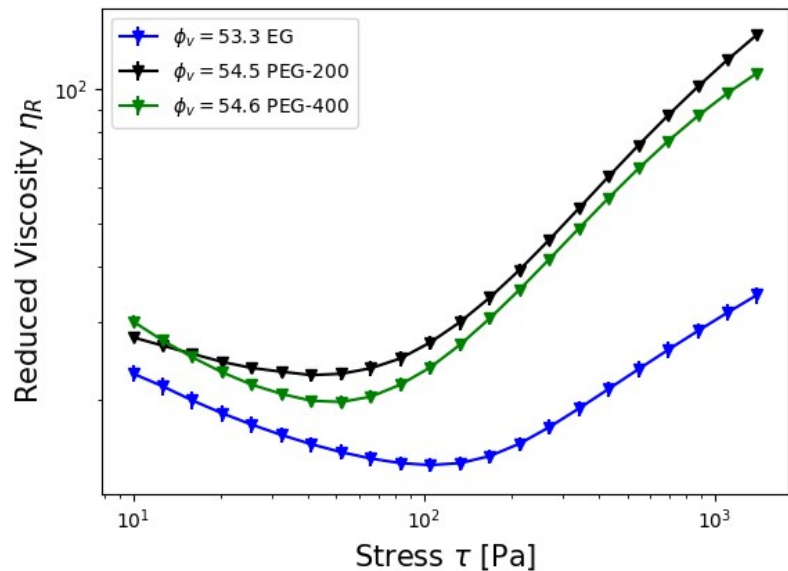

**Figure S3:** Steady state rheometry data from suspensions of spherical silica particles with a diameter of 500nm. Reduced viscosity is plotted as a function of shear stress in EG, PEG-200, and PEG-400.
